# Supplementary material for: Total and Plant Protein Consumption: The Role of Inflammation and Risk of Non-Communicable Disease
Source: MDPI journal article supplement (doi:10.3390/ijms23148008), 2022-07-20
Supplement: s1 [file s1]

**Table S1.** Physical characteristics and HOMA-IR by sex, class age and quintile category of average protein intake (g/kg/d)

| Quintiles of protein intake<br>by sex and age | n   | AGE years<br>Mean | Sd   | BMI kg/m <sup>2</sup><br>mean | sd                   | FAT kg<br>mean | sd                   | FM %<br>mean | sd                 | FFM kg<br>mean | sd                   | HOMA-IR<br>mean | sem    |
|-----------------------------------------------|-----|-------------------|------|-------------------------------|----------------------|----------------|----------------------|--------------|--------------------|----------------|----------------------|-----------------|--------|
| MEN                                           | 119 | 57,7              | 15,9 | 27,34                         | 0,42                 | 56,4           | 56,4                 | 28,36        | 0,50 <sup>a</sup>  | 56,4           | 6,7                  | 2,81            | 0,24   |
| Men <60 years (overall)                       | 68  | 45,1              | 11,4 | 26,7                          | 3,9                  | 22,1           | 6,7                  | 27,1         | 5,9                | 57,9           | 7,4                  | 2,51            | 0,29*  |
| Q1:0.623 (g/kg/d)                             | 15  | 47,2              | 10,9 | 29,5                          | 4,7 <sup>a,b</sup>   | 25,4           | 6,4 <sup>a</sup>     | 29,1         | 4,6                | 61,7           | 10,7                 | 4,18            | 0,60   |
| Q2:0.823                                      | 16  | 48,8              | 7,1  | 27,7                          | 3,2                  | 24,8           | 6,1 <sup>b</sup>     | 29,9         | 4,6 <sup>a</sup>   | 57,3           | 5,7                  | 2,35            | 0,58   |
| Q3:0.975                                      | 11  | 45,5              | 13,3 | 26,2                          | 3,2                  | 22,7           | 6,4                  | 28,1         | 6,2                | 57,1           | 6,5                  | 1,89            | 0,74   |
| Q4:1.182                                      | 15  | 39,9              | 12,6 | 25,5                          | 3,2 <sup>a</sup>     | 19,5           | 6,9                  | 24,4         | 6,4                | 59,0           | 5,1                  | 2,34            | 0,62   |
| Q5:1.518                                      | 11  | 43,7              | 12,5 | 23,9                          | 2,4 <sup>b</sup>     | 16,4           | 5,6 <sup>a,b</sup>   | 23,2         | 5,9 <sup>a</sup>   | 53,2           | 5,5                  | 1,80            | 0,70   |
| Men ≥60 years (overall)                       | 51  | 70,4              | 6,9  | 28,2                          | 3,3                  | 23,7           | 6,0                  | 30,0         | 4,8                | 54,3           | 4,9                  | 3,12            | 0,37** |
| Q1:0.623 (g/kg/d)                             | 14  | 72,6              | 7,0  | 28,8                          | 3,9                  | 24,1           | 6,7                  | 29,7         | 4,8                | 55,6           | 5,3                  | 2,66            | 0,64   |
| Q2:0.823                                      | 14  | 68,4              | 7,5  | 27,9                          | 2,7                  | 23,9           | 4,                   | 30,4         | 4,0                | 54,1           | 5,1                  | 3,11            | 0,62   |
| Q3:0.975                                      | 11  | 69,8              | 6,3  | 28,8                          | 3,2                  | 25,8           | 6,7                  | 31,6         | 6,0                | 54,9           | 3,4                  | 5,04            | 0,70   |
| Q4:1.182                                      | 5   | 70,6              | 5,7  | 27,9                          | 3,2                  | 21,4           | 5,6                  | 27,8         | 4,9                | 54,7           | 3,7                  | 1,23            | 1,16   |
| Q5:1.518                                      | 7   | 70,6              | 7,3  | 27,4                          | 4,1                  | 21,1           | 5,9                  | 29,0         | 4,5                | 50,8           | 6,4                  | 3,56            | 0,88   |
| WOMEN                                         | 228 | 57,41             | 15,2 | 27,90                         | 0,31                 | 41,5           | 41,5                 | 38,17        | 0,37 <sup>b</sup>  | 41,5           | 6,4                  | 2,45            | 0,17   |
| Women <60 years (overall)                     | 153 | 45,23             | 11,6 | 26,9                          | 0,35*                | 41,6           | 41,6                 | 37,45        | 0,42**             | 41,6           | 6,8                  | 2,11            | 0,19   |
| Q1:0.623 (g/kg/d)                             | 26  | 46,5              | 11,2 | 29,1                          | 6,6 <sup>c</sup>     | 29,7           | 9,3 <sup>a,b</sup>   | 39,3         | 5,1 <sup>a</sup>   | 44,6           | 7,8                  | 2,32            | 0,64   |
| Q2:0.823                                      | 30  | 48,7              | 9,6  | 29,9                          | 6,2 <sup>d,e</sup>   | 29,7           | 8,9 <sup>c,d</sup>   | 39,2         | 6,2 <sup>b</sup>   | 44,9           | 8,5                  | 2,37            | 0,43   |
| Q3:0.975                                      | 28  | 45,2              | 12,2 | 26,8                          | 3,7                  | 26,0           | 6,8 <sup>e</sup>     | 38,2         | 5,0                | 41,3           | 4,7                  | 2,26            | 0,44   |
| Q4:1.182                                      | 31  | 42,5              | 12,3 | 25,5                          | 4,4 <sup>d</sup>     | 23,2           | 6,3 <sup>a,c</sup>   | 35,4         | 4,8                | 41,4           | 5,8                  | 1,67            | 0,42   |
| Q5:1.518                                      | 38  | 43,9              | 12,2 | 23,7                          | 3,5 <sup>c,e</sup>   | 20,6           | 5,3 <sup>b,d,e</sup> | 35,0         | 5,6 <sup>a,b</sup> | 37,4           | 3,7                  | 1,90            | 0,38   |
| Women ≥60 years (overall)                     | 75  | 69,5              | 5,7  | 28,8                          | 4,7                  | 26,7           | 6,5                  | 38,9         | 4,5                | 41,3           | 5,7                  | 2,79            | 0,28   |
| Q1:0.623 (g/kg/d)                             | 13  | 69,8              | 5,6  | 30,4                          | 4,4 <sup>f</sup>     | 29,1           | 7,4                  | 40,2         | 5,7                | 42,6           | 4,3 <sup>a,b</sup>   | 3,77            | 0,64   |
| Q2:0.823                                      | 10  | 68,0              | 5,7  | 31,5                          | 4,3 <sup>g</sup>     | 29,5           | 6,3                  | 39,1         | 5,0                | 45,3           | 5,0 <sup>c,d</sup>   | 3,93            | 0,73   |
| Q3:0.975                                      | 19  | 69,1              | 4,7  | 30,2                          | 4,7 <sup>h</sup>     | 28,4           | 6,8                  | 39,7         | 4,0                | 42,5           | 5,9 <sup>e</sup>     | 1,89            | 0,55   |
| Q4:1.182                                      | 19  | 69,7              | 5,7  | 27,0                          | 4,1                  | 24,9           | 5,1                  | 38,5         | 3,5                | 39,5           | 5,3 <sup>a,c</sup>   | 2,48            | 0,53   |
| Q5:1.518                                      | 14  | 70,9              | 7,3  | 24,9                          | 2,5 <sup>f,g,h</sup> | 22,6           | 5,0                  | 37,0         | 4,9                | 38,1           | 5,3 <sup>b,d,e</sup> | 1,88            | 0,62   |
| P-Values§                                     |     |                   |      |                               |                      |                |                      |              |                    |                |                      |                 |        |
| Sex                                           |     | n.s.              |      | n.s                           |                      | 0,000          |                      | 0,000        |                    | 0,000          |                      | n.s.            |        |
| Age class                                     |     | 0,000             |      | 0,001                         |                      | n.s.           |                      | 0,001        |                    | 0,007          |                      | 0,026           |        |
| Quintile                                      |     | n.s               |      | 0.000                         |                      | 0,000          |                      | 0,000        |                    | 0,000          |                      | 0,046           |        |
| Interaction                                   |     |                   |      |                               |                      |                |                      |              |                    |                |                      |                 |        |
| Sex * Age class                               |     | n.s               |      | n.s                           |                      | n.s            |                      | n.s          |                    | n.s            |                      | n.s.            |        |
| Sex *Quintile                                 |     | n.s               |      | n.s                           |                      | n.s            |                      | n.s          |                    | n.s            |                      | n.s.            |        |
| Age class *Quintile                           |     | n.s               |      | n.s                           |                      | n.s            |                      | n.s          |                    | n.s            |                      | n.s.            |        |
| Sex*Age class*Quintile                        |     | n.s               |      | n.s                           |                      | n.s            |                      | n.s          |                    | n.s            |                      | 0,001           |        |

§Three Way Analysis of Variance Factor: The values with different superscript letters in the same column are significantly different (p<0.05). Three Way Analysis of Variance Factor by sex (a vs b) by class age (\* vs\*\*), by quintiles (<sup>abcde</sup>fg<sup>h</sup>) BMI = body mass index, FFM= Fat free mass; FAT= fat mass, HOMA-IR= Homeostatic Model Assessment for Insulin Resistance

**Table S2.** Prevalence (%) of disease risk factors by sex, class age and quintile category of average protein intake (g/kgxd)

|                                     | Healthy <sup>†</sup> |     | Medium NCDs risk <sup>†</sup> |    | High NCDs risk <sup>†</sup> |    | Hypertension <sup>†</sup> |                   | Dyslipidemia <sup>†</sup> |    | MetSyn <sup>†</sup> |    |
|-------------------------------------|----------------------|-----|-------------------------------|----|-----------------------------|----|---------------------------|-------------------|---------------------------|----|---------------------|----|
|                                     | n                    | %   | n                             | %  | n                           | %  | n                         | %                 | N                         | %  | n                   | %  |
| <i>Men &lt;60 years (overall)</i>   | 12                   | 18  | 29                            | 43 | 16                          | 24 | 24                        | 35 <sup>a*</sup>  | 14                        | 21 | 32                  | 47 |
| Q1:0.623 (g/kg/d)                   | 1                    | 8   | 5                             | 17 | 7                           | 44 | 7                         | 29                | 1                         | 7  | 12                  | 38 |
| Q2:0.823                            |                      |     | 10                            | 34 | 3                           | 19 | 5                         | 21                | 6                         | 43 | 10                  | 31 |
| Q3:0.975                            | 2                    | 17  | 5                             | 17 | 2                           | 13 | 3                         | 13                | 3                         | 21 | 3                   | 9  |
| Q4:1.182                            | 4                    | 33  | 5                             | 17 | 3                           | 19 | 6                         | 25                | 2                         | 14 | 4                   | 13 |
| Q5:1.518                            | 5                    | 42  | 4                             | 14 | 1                           | 6  | 3                         | 13                | 2                         | 14 | 3                   | 9  |
| <i>Men ≥60 years (overall)</i>      | 1                    | 2   | 23                            | 45 | 20                          | 39 | 43                        | 84 <sup>a**</sup> | 24                        | 47 | 39                  | 76 |
| Q1:0.623 (g/kg/d)                   |                      |     | 8                             | 35 | 5                           | 25 | 13                        | 30                | 5                         | 21 | 11                  | 28 |
| Q2:0.823                            |                      |     | 8                             | 35 | 4                           | 20 | 12                        | 28                | 7                         | 29 | 13                  | 33 |
| Q3:0.975                            |                      |     | 4                             | 17 | 6                           | 30 | 7                         | 16                | 4                         | 17 | 7                   | 18 |
| Q4:1.182                            | 1                    | 100 | 2                             | 9  | 2                           | 10 | 4                         | 9                 | 4                         | 17 | 3                   | 8  |
| Q5:1.518                            |                      |     | 1                             | 4  | 3                           | 15 | 7                         | 16                | 4                         | 17 | 5                   | 13 |
| <i>Women &lt;60 years (overall)</i> | 36                   | 24  | 40                            | 26 | 48                          | 31 | 36                        | 24 <sup>b*</sup>  | 26                        | 17 | 79                  | 52 |
| Q1:0.623 (g/kg/d)                   | 2                    | 6   | 5                             | 13 | 13                          | 27 | 7                         | 19                | 9                         | 35 | 18                  | 23 |
| Q2:0.823                            | 6                    | 17  | 3                             | 8  | 20                          | 42 | 8                         | 22                | 6                         | 23 | 17                  | 22 |
| Q3:0.975                            | 4                    | 11  | 14                            | 35 | 7                           | 15 | 7                         | 19                | 3                         | 12 | 16                  | 20 |
| Q4:1.182                            | 9                    | 25  | 11                            | 28 | 4                           | 8  | 8                         | 22                | 2                         | 8  | 13                  | 16 |
| Q5:1.518                            | 15                   | 42  | 7                             | 18 | 4                           | 8  | 6                         | 17                | 6                         | 23 | 15                  | 19 |
| <i>Women ≥60 years (overall)</i>    | 2                    | 3   | 16                            | 21 | 41                          | 55 | 55                        | 73 <sup>b**</sup> | 38                        | 51 | 57                  | 76 |
| Q1:0.623 (g/kg/d)                   | 1                    | 50  | 3                             | 19 | 9                           | 22 | 8                         | 15                | 7                         | 18 | 10                  | 18 |
| Q2:0.823                            |                      |     | 1                             | 6  | 8                           | 20 | 8                         | 15                | 4                         | 11 | 6                   | 11 |
| Q3:0.975                            |                      |     | 5                             | 31 | 11                          | 27 | 13                        | 24                | 10                        | 26 | 13                  | 23 |
| Q4:1.182                            |                      |     | 5                             | 31 | 9                           | 22 | 14                        | 25                | 11                        | 29 | 18                  | 32 |
| Q5:1.518                            | 1                    | 50  | 2                             | 13 | 4                           | 10 | 12                        | 22                | 6                         | 16 | 10                  | 18 |

Prevalence of hypertension (p<0.05) was significantly higher among men than women (a vs b). Prevalence of CV risk, metabolic syndrome, hypertension, and dyslipidaemia was significantly (P<0.05) higher in older subjects (\* vs \*\*). † Differences in health outcomes and quintiles explored by  $\chi^2$  test: CV risk (P = <0,001); Hypertension (P = 0,002); MetSyn (P = <0,001); Dyslipidemia (P = 0,003)
